# Supplementary material for: Excess Body Fatness during Early to Mid-Adulthood and Survival from Colorectal and Breast Cancer: A Pooled Analysis of Five International Cohort Studies
Source: Oxford University Press journal article supplement (doi:10.1158/1055-9965.epi-21-0688), 2021-11-16
Supplement: 10559965epi210688-sup-266734_2_supp_7428506_r05dsm.docx [file 10559965epi210688-sup-266734_2_supp_7428506_r05dsm.docx]

**Online Supporting Material**

**Excess body fatness during early to mid-adulthood and survival in colorectal and breast cancer patients: a pooled analysis of international cohort studies**

Hadrien Charvat1, Heinz Freisling2, Hwayoung Noh2, Mia M. Gaudet3, Marc J. Gunter2, Amanda J. Cross4, Konstantinos K. Tsilidis4,5, Anne Tjønneland6,7, Verena Katzke8, Manuela Bergmann9, Claudia Agnoli10, Charlotta Rylander11, Guri Skeie11,12, Paula Jakszyn13,14, Ann H Rosendahl15, Malin Sund16, Gianluca Severi17, Shoichiro Tsugane18, Norie Sawada18, Hermann Brenner8, Hans-Olov Adami19,20, Elisabete Weiderpass21, Isabelle Soerjomataram1, Melina Arnold1

Supplementary Table 1. Summary of available variables by cohort.

|  | **Harmonised categories** | **CPS-II** | **EPIC** | **WLHS** | **JPHC I** | **JPHC II** |
| --- | --- | --- | --- | --- | --- | --- |
| **TNM stage / extent at diagnosis** | Localised | Localised | Localised | Stage I | Localised | Localised |
| Regional | Regional | Metastatic regional | Stage II | Lymph nodes | Lymph nodes |
| Stage III | Regional | Regional |
| Distant | Distant | Metastatic | Stage IV | Distant | Distant |
| Metastatic distant |
| Missing | Unstaged / Missing | Unknown | Missing | Unknown | Unknown |
| Missing |
| **Smoking status** | Never | Never | Never | Never | Never | Never |
| Ever | Former | Former | Ever | Past | Past |
| Current | Current | Current | Current |
| Missing | Missing | Unknown | - | - | - |
| **Regular alcohol consumption** | No | None | Non drinker | 12 g/d | Rarely | 1-3 days/month |
| 1 drink/day | 0-6 g/d (M)  0-3 g/d (W) | 1-3 days/month |
| 6-12 g/d (M)  3-12 g/d (W) | 1-2 days/week | 1-2 days/week |
| Yes | 1 drink/day | 12-24 g/d | 12 g/d | 3-4 days/week | 3-4 days/week |
| 2 drinks/day | 24-60 g/d | 5-6 days/week | Almost everyday |
| 60-96 g/d (M)  60 g/d (W) | Everyday |
| 96 g/d (M) |
| Missing | Missing / Unknown | - | - | - | - |
| **Highest level of education achieved** | Low | Junior high school | None | Low | Junior high school | - |
| Primary school completed |
| Medium | High school | Technical / professional school | High school |
| Secondary school | High | College / Vocational school |
| High | College | Longer education (incl. University) | University |
| University | Others |
| Missing | Missing | Not specified | - | - |
| Missing |
| **Physical activity** | No | No | No vigorous physical activity | Very low | Rarely | Rarely |
| Low | 1-3 days/month | 1-3 days/month |
| Normal |
| Yes | Vigorous physical activity at least once a week | 2 hours/week | High | 1-2 days/week | 1-2 days/week |
| 2 hours/week | 3-4 days/week | 3-4 days/week |
| Very high | Almost everyday | Almost everyday |
| Missing | Missing / Unknown | Unknown duration | - | - | - |
| Unknown |
| **Diabetes history** | No | No | No | No | No | No |
| Yes | Yes | Yes | Yes | Yes | Yes |
| Missing | Unknown | Do not know | Unknown | - | - |
| Missing |

Supplementary Table 2. Baseline (1992 questionnaire) demographic and exposure-related characteristics of participants in the Cancer Prevention Study II (CPS-II) diagnosed with breast cancer after the age of 50 years.

|  | Breast cancer after age 50 (women, n = 5292) | | | |  |
| --- | --- | --- | --- | --- | --- |
|  | Predicted mean BMI < kg/m2 | | Predicted mean BMI kg/m2 | |  |
|  | N | Proportion (%) | N | Proportion (%) |  |
|  |  |  |  |  |  |
| **Patient characteristics** | 4181 | 78.6 | 1111 | 21.4 |  |
| Age at cancer diagnosisa (years) | 71.6 (66.2-76.8) | | 70.4 (65.4-75.6) | |  |
| Follow-up durationa (years) | 10.7 (6.0-15.2) | | 9.4 (5.2-14.8) | |  |
| Number of deaths | 1370 | 32.8 | 432 | 38.9 |  |
| Tumour extent at diagnosis |  |  |  |  |  |
| *Localised* | 3149 | 75.3 | 814 | 73.3 |  |
| *Regional* | 909 | 21.8 | 261 | 23.5 |  |
| *Distant* | 72 | 1.7 | 24 | 2.1 |  |
| *Missing/Unstaged* | 51 | 1.2 | 12 | 1.1 |  |
|  |  |  |  |  |  |
| **Baseline characteristics** |  |  |  |  |  |
| Smoking |  |  |  |  |  |
| *Never* | 2164 | 51.8 | 617 | 55.6 |  |
| *Ever* | 1954 | 46.7 | 477 | 42.9 |  |
| *Missing/Unknown* | 63 | 1.5 | 17 | 1.5 |  |
| Vigorous physical activity |  |  |  |  |  |
| *No* | 3069 | 73.4 | 841 | 75.7 |  |
| *Yes* | 356 | 8.5 | 83 | 7.5 |  |
| *Missing/Unknown* | 756 | 18.1 | 187 | 16.8 |  |
| Alcohol consumption |  |  |  |  |  |
| *No* | 3331 | 79.7 | 974 | 87.7 |  |
| *Yes* | 712 | 17.0 | 84 | 7.5 |  |
| *Missing/Unknown* | 138 | 3.3 | 53 | 4.8 |  |
| Education |  |  |  |  |  |
| *Low* | 120 | 2.9 | 65 | 5.9 |  |
| *Medium* | 1190 | 28.4 | 376 | 33.8 |  |
| *High* | 2846 | 68.1 | 664 | 59.8 |  |
| *Missing/Unknown* | 25 | 0.6 | 6 | 0.5 |  |
| History of diabetes mellitus |  |  |  |  |  |
| *No* | 4009 | 95.9 | 973 | 87.6 |  |
| *Yes* | 158 | 3.8 | 132 | 11.9 |  |
| *Missing/Unknown* | 14 | 0.3 | 6 | 0.5 |  |

aFor continuous variables, results are presented as median (25th, 75th percentiles).

Supplementary Table 3. Baseline demographic and exposure-related characteristics of the participants in the European Prospective Investigation into Cancer (EPIC) and nutrition study diagnosed with breast or colorectal cancer after the age of 50 years.

|  | Breast cancer after age 50 (women, n = 9171) | |  | Colorectal cancer after age 50 (women, n = 2635) | |  | Colorectal cancer after age 50 (men, n = 2029) | |
| --- | --- | --- | --- | --- | --- | --- | --- | --- |
|  | Predicted mean BMI<25 kg/m2 | Predicted mean BMI25 kg/m2 |  | Predicted mean BMI<25 kg/m2 | Predicted mean BMI25 kg/m2 |  | Predicted mean BMI<25 | Predicted mean BMI25 kg/m2 |
|  |
|  |  |  |  |  |  |  |  |  |
| **Patient characteristics** | 7433 (81.0) | 1738 (19.0) |  | 1989 (75.5) | 646 (24.5) |  | 971 (47.9) | 1058 (52.1) |
| Age at cancer diagnosisa (years) | 62.8  (57.5, 68.3) | 63.8  (58.3, 68.9) |  | 66.9  (61.1, 73.2) | 67.2  (61.7, 72.7) |  | 68.7  (63.7, 74.4) | 67.4  (62.4, 72.4) |
| Follow-up durationa (years) | 7.6 (4.4, 11.1) | 6.2 (3.4, 9.7) |  | 4.7 (2.1, 8.5) | 4.2 (2.1, 7.7) |  | 4.2 (2.0, 7.5) | 4.2 (2.1, 7.6) |
| Number of deaths | 1105 (14.9) | 309 (17.8) |  | 748 (37.6) | 277 (42.9) |  | 462 (47.6) | 481 (45.5) |
| Stage at diagnosis |  |  |  |  |  |  |  |  |
| *Localised* | 3048 (41.0) | 603 (34.7) |  | 404 (20.3) | 151 (23.4) |  | 156 (16.1) | 280 (26.5) |
| *Regional* | 1184 (15.9) | 230 (13.2) |  | 214 (10.8) | 57 (8.8) |  | 28 (2.9) | 107 (10.1) |
| *Distant* | 130 (1.8) | 55 (3.2) |  | 327 (16.4) | 111 (17.2) |  | 121 (12.4) | 152 (14.4) |
| *Missing/Unstaged* | 3071 (41.3) | 850 (48.9) |  | 1044 (52.5) | 327 (50.6) |  | 666 (68.6) | 519 (49.0) |
|  |  |  |  |  |  |  |  |  |
| **Baseline characteristics** |  |  |  |  |  |  |  |  |
| Smoking |  |  |  |  |  |  |  |  |
| *Never* | 3923 (52.8) | 974 (56.0) |  | 966 (48.6) | 385 (59.6) |  | 259 (26.7) | 238 (22.5) |
| *Ever* | 3312 (44.6) | 740 (42.6) |  | 983 (49.4) | 254 (39.3) |  | 700 (72.1) | 811 (76.7) |
| *Missing/Unknown* | 198 (2.6) | 24 (1.4) |  | 40 (2.0) | 7 (1.1) |  | 12 (1.2) | 9 (0.8) |
| Vigorous physical activity |  |  |  |  |  |  |  |  |
| *No* | 2465 (33.2) | 669 (38.5) |  | 653 (32.8) | 270 (41.8) |  | 216 (22.2) | 451 (42.6) |
| *Yes* | 2332 (31.4) | 461 (26.5) |  | 528 (26.6) | 153 (23.7) |  | 391 (40.3) | 368 (34.8) |
| *Unknown* | 2636 (35.4) | 608 (35.0) |  | 808 (40.6) | 223 (34.5) |  | 364 (37.5) | 239 (22.6) |
| Alcohol consumption |  |  |  |  |  |  |  |  |
| *No* | 5231 (70.4) | 1374 (79.1) |  | 1489 (74.9) | 538 (83.3) |  | 436 (44.9) | 394 (37.2) |
| *Yes* | 2202 (29.6) | 364 (20.9) |  | 500 (25.1) | 108 (16.7) |  | 535 (55.1) | 664 (62.8) |
| *Missing/Unknown* | 0 (0.0) | 0 (0.0) |  | 0 (0.0) | 0 (0.0) |  | 0 (0.0) | 0 (0.0) |
| Education |  |  |  |  |  |  |  |  |
| *Low* | 1486 (20.0) | 736 (42.3) |  | 573 (28.8) | 302 (46.8) |  | 274 (28.2) | 470 (44.4) |
| *Medium* | 3656 (49.2) | 678 (39.0) |  | 898 (45.1) | 245 (37.9) |  | 389 (40.1) | 335 (31.7) |
| *High* | 1910 (25.7) | 215 (12.4) |  | 377 (19.0) | 59 (9.1) |  | 263 (27.1) | 217 (20.5) |
| *Missing/Unknown* | 381 (5.1) | 109 (6.3) |  | 141 (7.1) | 40 (6.2) |  | 45 (4.6) | 36 (3.4) |
| History of diabetes mellitus |  |  |  |  |  |  |  |  |
| *No* | 6586 (88.6) | 1449 (83.4) |  | 1696 (85.3) | 518 (80.2) |  | 767 (79.0) | 875 (82.7) |
| *Yes* | 99 (1.3) | 85 (4.9) |  | 33 (1.6) | 44 (6.8) |  | 27 (2.8) | 61 (5.8) |
| *Missing/Unknown* | 748 (10.1) | 204 (11.7) |  | 260 (13.1) | 84 (13.0) |  | 177 (18.2) | 122 (11.5) |

aFor continuous variables, results are presented as median (25th, 75th percentiles).

Supplementary Table 4. Baseline demographic and exposure-related characteristics of the participants in the Japan Public Health Center-based Study I cohort diagnosed with breast or colorectal cancer after the age of 50 years.

|  | Breast cancer after age 50 (women, n = 363) | |  | Colorectal cancer after age 50 (women, n = 402) | |  | Colorectal cancer after age 50 (men, n = 567) | |
| --- | --- | --- | --- | --- | --- | --- | --- | --- |
|  | Predicted mean BMI<25 | Predicted mean BMI25 |  | Predicted mean BMI<25 | Predicted mean BMI25 |  | Predicted mean BMI<25 | Predicted mean BMI25 |
|  |
|  |  |  |  |  |  |  |  |  |
| **Patient characteristics** | 305 (84.0) | 58 (16.0) |  | 339 (84.3) | 63 (15.7) |  | 449 (79.2) | 118 (20.8) |
| Age at cancer diagnosisa (years) | 65.8  (60.6, 70.4) | 66.2  (58.8, 71.7) |  | 69.7  (64.1, 74.8) | 70.2  (63.2, 75.8) |  | 68.8  (63.9, 74.6) | 67.4  (63.7, 72.8) |
| Follow-up durationa (years) | 8.8 (4.3, 13.6) | 6.7 (4.9, 12.1) |  | 6.1 (3.1, 10.8) | 4.8 (1.2, 7.2) |  | 5.4 (1.9, 9.4) | 5.3 (1.7, 9.2) |
| Number of deaths | 77 (25.3) | 12 (20.7) |  | 119 (35.1) | 27 (42.9) |  | 237 (52.8) | 65 (55.1) |
| Stage at diagnosis |  |  |  |  |  |  |  |  |
| *Localised* | 182 (59.7) | 33 (56.9) |  | 131 (38.6) | 23 (36.5) |  | 201 (44.8) | 47 (39.8) |
| *Regional* | 80 (26.2) | 22 (37.9) |  | 123 (36.3) | 20 (31.8) |  | 110 (24.5) | 39 (33.1) |
| *Distant* | 18 (5.9) | 3 (5.2) |  | 49 (14.5) | 8 (12.7) |  | 86 (19.1) | 24 (20.3) |
| *Missing/Unstaged* | 25 (8.2) | 0 (0.0) |  | 36 (10.6) | 12 (19.0) |  | 52 (11.6) | 8 (6.8) |
|  |  |  |  |  |  |  |  |  |
| **Baseline characteristics** |  |  |  |  |  |  |  |  |
| Smoking |  |  |  |  |  |  |  |  |
| *Never* | 289 (94.7) | 56 (96.6) |  | 315 (92.9) | 53 (84.1) |  | 74 (16.5) | 22 (18.6) |
| *Ever* | 16 (5.3) | 2 (3.4) |  | 24 (7.1) | 10 (15.9) |  | 375 (83.5) | 96 (81.4) |
| *Missing/Unknown* | 0 (0.0) | 0 (0.0) |  | 0 (0.0) | 0 (0.0) |  | 0 (0.0) | 0 (0.0) |
| Vigorous physical activity |  |  |  |  |  |  |  |  |
| *No* | 252 (82.6) | 50 (86.2) |  | 290 (85.5) | 53 (84.1) |  | 372 (82.9) | 100 (84.8) |
| *Yes* | 48 (15.8) | 8 (13.8) |  | 41 (12.1) | 8 (12.7) |  | 71 (15.8) | 18 (15.2) |
| *Unknown* | 5 (1.6) | 0 (0.0) |  | 8 (2.4) | 2 (3.2) |  | 6 (1.3) | 0 (0.0) |
| Alcohol consumption |  |  |  |  |  |  |  |  |
| *No* | 286 (93.8) | 56 (96.6) |  | 320 (94.4) | 61 (96.8) |  | 159 (35.4) | 42 (35.6) |
| *Yes* | 18 (5.9) | 2 (3.4) |  | 17 (5.0) | 1 (1.6) |  | 290 (64.6) | 76 (64.4) |
| *Missing/Unknown* | 1 (0.3) | 0 (0.0) |  | 2 (0.6) | 1 (1.6) |  | 0 (0.0) | 0 (0.0) |
| Education |  |  |  |  |  |  |  |  |
| *Low* | 134 (43.9) | 24 (41.4) |  | 192 (56.6) | 35 (55.6) |  | 211 (47.0) | 56 (47.4) |
| *Medium* | 115 (37.7) | 27 (46.6) |  | 86 (25.4) | 13 (20.6) |  | 161 (35.9) | 50 (42.4) |
| *High* | 40 (13.1) | 5 (8.6) |  | 39 (11.5) | 10 (15.9) |  | 63 (14.0) | 10 (8.5) |
| *Missing/Unknown* | 16 (5.3) | 2 (3.4) |  | 22 (6.5) | 5 (7.9) |  | 14 (3.1) | 2 (1.7) |
| History of diabetes mellitus |  |  |  |  |  |  |  |  |
| *No* | 301 (98.7) | 55 (94.8) |  | 332 (97.9) | 61 (96.8) |  | 423 (94.2) | 113 (95.8) |
| *Yes* | 4 (1.3) | 3 (5.2) |  | 7 (2.1) | 2 (3.2) |  | 26 (5.8) | 5 (4.2) |
| *Missing/Unknown* | 0 (0.0) | 0 (0.0) |  | 0 (0.0) | 0 (0.0) |  | 0 (0.0) | 0 (0.0) |

aFor continuous variables, results are presented as median (25th, 75th percentiles).

Supplementary Table 5. Baseline demographic and exposure-related characteristics of the participants in the Japan Public Health Center-based Study II (JPHC-II) cohort diagnosed with breast or colorectal cancer after the age of 50 years.

|  | Breast cancer after age 50 (women, n = 383) | |  | Colorectal cancer after age 50 (women, n = 494) | |  | Colorectal cancer after age 50 (men, n = 754) | |
| --- | --- | --- | --- | --- | --- | --- | --- | --- |
|  | Predicted mean BMI<25 kg/m2 | Predicted mean BMI25 kg/m2 |  | Predicted mean BMI<25 kg/m2 | Predicted mean BMI25 kg/m2 |  | Predicted mean BMI<25 kg/m2 | Predicted mean BMI25 kg/m2 |
|  |  |  |  |  |  |  |  |  |
| **Patient characteristics** | 329 (85.9) | 54 (14.1) |  | 428 (86.6) | 66 (13.4) |  | 624 (82.8) | 130 (17.2) |
| Age at cancer diagnosisa (years) | 65.5  (60.0, 72.8) | 67.4  (61.3, 73.7) |  | 72.7  (65.3, 78.5) | 71.2  (64.4, 77.9) |  | 71.4  (65.0, 77.8) | 69.6  (63.5, 75.5) |
| Follow-up durationa (years) | 6.9 (4.0, 10.9) | 6.0 (3.2, 10.0) |  | 5.0 (1.3, 10.1) | 6.1 (2.4, 10.0) |  | 4.8 (1.5, 9.3) | 5.6 (3.1, 9.8) |
| Number of deaths | 101 (30.7) | 14 (25.9) |  | 203 (47.4) | 31 (47.0) |  | 345 (55.3) | 71 (54.6) |
| Stage at diagnosis |  |  |  |  |  |  |  |  |
| *Localised* | 177 (53.8) | 26 (48.1) |  | 174 (40.7) | 29 (43.9) |  | 287 (46.0) | 68 (52.3) |
| *Regional* | 93 (28.3) | 19 (35.2) |  | 110 (25.7) | 25 (37.9) |  | 167 (26.8) | 38 (29.2) |
| *Distant* | 18 (5.5) | 2 (3.7) |  | 67 (15.6) | 8 (12.1) |  | 82 (13.1) | 13 (10.0) |
| *Missing/Unstaged* | 41 (12.4) | 7 (13.0) |  | 77 (18.0) | 4 (6.1) |  | 88 (14.1) | 11 (8.5) |
|  |  |  |  |  |  |  |  |  |
| **Baseline characteristics** |  |  |  |  |  |  |  |  |
| Smoking |  |  |  |  |  |  |  |  |
| *Never* | 303 (92.1) | 48 (88.9) |  | 392 (91.6) | 60 (90.9) |  | 116 (18.6) | 33 (25.4) |
| *Ever* | 24 (7.3) | 6 (11.1) |  | 32 (7.5) | 6 (9.1) |  | 503 (80.6) | 97 (74.6) |
| *Missing/Unknown* | 2 (0.6) | 0 (0.0) |  | 4 (0.9) | 0 (0.0) |  | 5 (0.8) | 0 (0.0) |
| Vigorous physical activity |  |  |  |  |  |  |  |  |
| *No* | 265 (80.6) | 39 (72.2) |  | 336 (78.5) | 48 (72.7) |  | 491 (78.7) | 100 (76.9) |
| *Yes* | 60 (18.2) | 14 (25.9) |  | 87 (20.3) | 18 (27.3) |  | 128 (20.5) | 29 (22.3) |
| *Unknown* | 4 (1.2) | 1 (1.9) |  | 5 (1.2) | 0 (0.0) |  | 5 (0.8) | 1 (0.8) |
| Alcohol consumption |  |  |  |  |  |  |  |  |
| *No* | 287 (87.2) | 51 (94.4) |  | 389 (90.9) | 62 (93.9) |  | 198 (31.7) | 60 (46.2) |
| *Yes* | 42 (12.8) | 3 (5.6) |  | 39 (9.1) | 4 (6.1) |  | 426 (68.3) | 70 (53.8) |
| *Missing/Unknown* | 0 (0.0) | 0 (0.0) |  | 0 (0.0) | 0 (0.0) |  | 0 (0.0) | 0 (0.0) |
| History of diabetes mellitus |  |  |  |  |  |  |  |  |
| *No* | 321 (97.6) | 53 (98.1) |  | 415 (97.0) | 63 (95.5) |  | 568 (91.0) | 118 (90.8) |
| *Yes* | 8 (2.4) | 1 (1.9) |  | 13 (3.0) | 3 (4.5) |  | 56 (9.0) | 12 (9.2) |
| *Missing/Unknown* | 0 (0.0) | 0 (0.0) |  | 0 (0.0) | 0 (0.0) |  | 0 (0.0) | 0 (0.0) |

aFor continuous variables, results are presented as median (25th, 75th percentiles).

Supplementary Table 6. Baseline demographic and exposure-related characteristics of the participants in the Swedish Women's Lifestyle and Health (WLHS) cohort diagnosed with breast or colorectal cancer after the age of 50 years.

|  | Breast cancer after age 50 (women, n = 863) | |  | Colorectal cancer after age 50 (women, n = 177) | |
| --- | --- | --- | --- | --- | --- |
|  | Predicted mean BMI<25 kg/m2 | Predicted mean BMI25 kg/m2 |  | Predicted mean BMI<25 kg/m2 | Predicted mean BMI25 kg/m2 |
|  |
|  |  |  |  |  |  |
| **Patient characteristics** | 748 (86.7) | 115 (13.3) |  | 155 (87.6) | 22 (12.4) |
| Age at cancer diagnosisa (years) | 57.2 (53.3, 61.4) | 58.0 (53.2, 62.6) |  | 58.8 (55.0, 63.2) | 62.2 (59.4, 65.6) |
| Follow-up durationa (years) | 5.3 (2.5, 9.5) | 4.2 (2.1, 7.8) |  | 2.4 (1.1, 6.3) | 1.8 (0.6, 2.9) |
| Number of deaths | 53 (7.1) | 12 (10.4) |  | 33 (21.3) | 7 (31.8) |
| Stage at diagnosis |  |  |  |  |  |
| *Localised* | 301 (40.2) | 41 (35.6) |  | 22 (14.2) | 2 (9.1) |
| *Regional* | 203 (27.2) | 31 (27.0) |  | 54 (34.8) | 8 (36.4) |
| *Distant* | 12 (1.6) | 0 (0.0) |  | 21 (13.6) | 7 (31.8) |
| *Missing/Unstaged* | 232 (31.0) | 43 (37.4) |  | 58 (37.4) | 5 (22.7) |
|  |  |  |  |  |  |
| **Baseline characteristics** |  |  |  |  |  |
| Smoking |  |  |  |  |  |
| *Never* | 282 (37.7) | 41 (35.6) |  | 66 (42.6) | 5 (22.7) |
| *Ever* | 462 (61.8) | 74 (64.4) |  | 88 (56.8) | 17 (77.3) |
| *Missing/Unknown* | 4 (0.5) | 0 (0.0) |  | 1 (0.6) | 0 (0.0) |
| Vigorous physical activity |  |  |  |  |  |
| *No* | 523 (69.9) | 94 (81.7) |  | 115 (74.2) | 18 (81.8) |
| *Yes* | 209 (27.9) | 21 (18.3) |  | 39 (25.2) | 4 (18.2) |
| *Unknown* | 16 (2.2) | 0 (0.0) |  | 1 (0.6) | 0 (0.0) |
| Alcohol consumption |  |  |  |  |  |
| *No* | 666 (89.0) | 108 (93.9) |  | 135 (87.1) | 21 (95.4) |
| *Yes* | 82 (11.0) | 7 (6.1) |  | 20 (12.9) | 1 (4.6) |
| *Missing/Unknown* | 0 (0.0) | 0 (0.0) |  | 0 (0.0) | 0 (0.0) |
| Education |  |  |  |  |  |
| *Low* | 303 (40.5) | 57 (49.6) |  | 60 (38.7) | 14 (63.6) |
| *High* | 432 (57.8) | 55 (47.8) |  | 89 (57.4) | 5 (22.7) |
| *Missing/Unknown* | 13 (1.7) | 3 (2.6) |  | 6 (3.9) | 3 (13.7) |
| History of diabetes mellitus |  |  |  |  |  |
| *No* | 693 (92.6) | 98 (85.2) |  | 150 (96.8) | 19 (86.4) |
| *Yes* | 5 (0.7) | 3 (2.6) |  | 0 (0.0) | 1 (4.5) |
| *Missing/Unknown* | 50 (6.7) | 14 (12.2) |  | 5 (3.2) | 2 (9.1) |

aFor continuous variables, results are presented as median (25th, 75th percentiles).


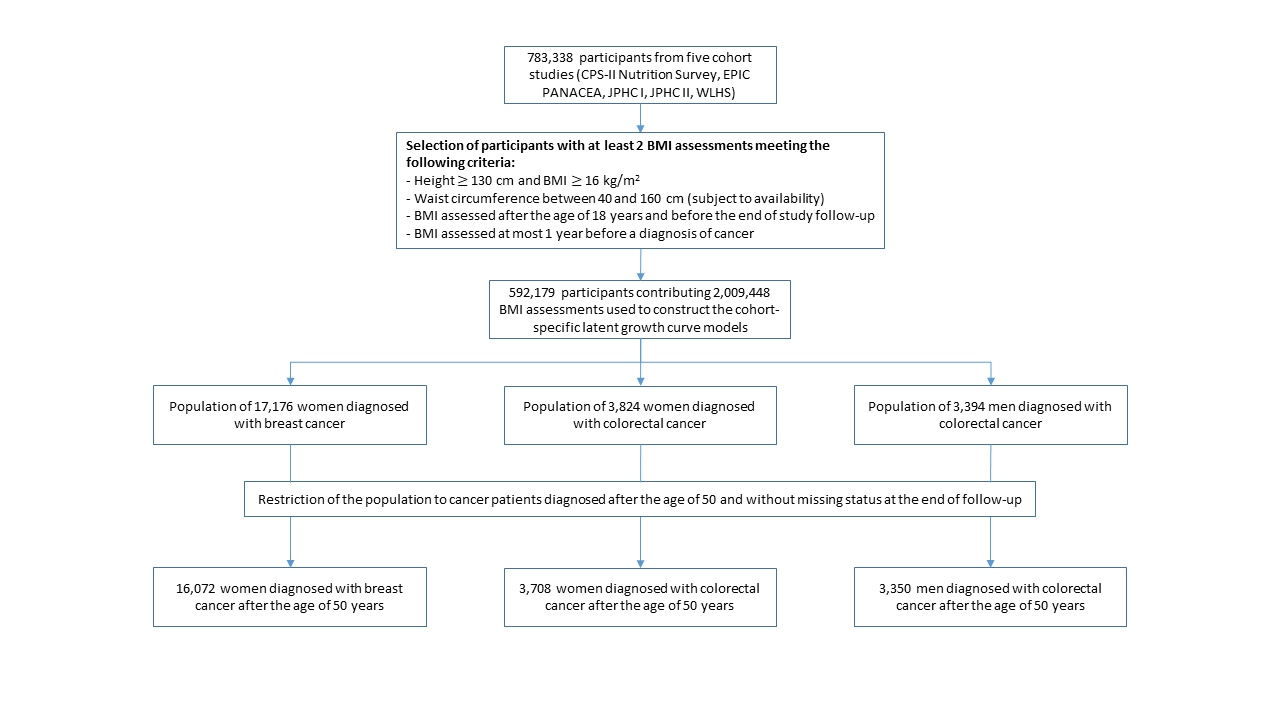


Supplementary Figure 1. Participant flow chart of participating cohorts with inclusion criteria, total number of participants, BMI assessments, and number of women and men with diagnosed breast cancer and colorectal cancer.


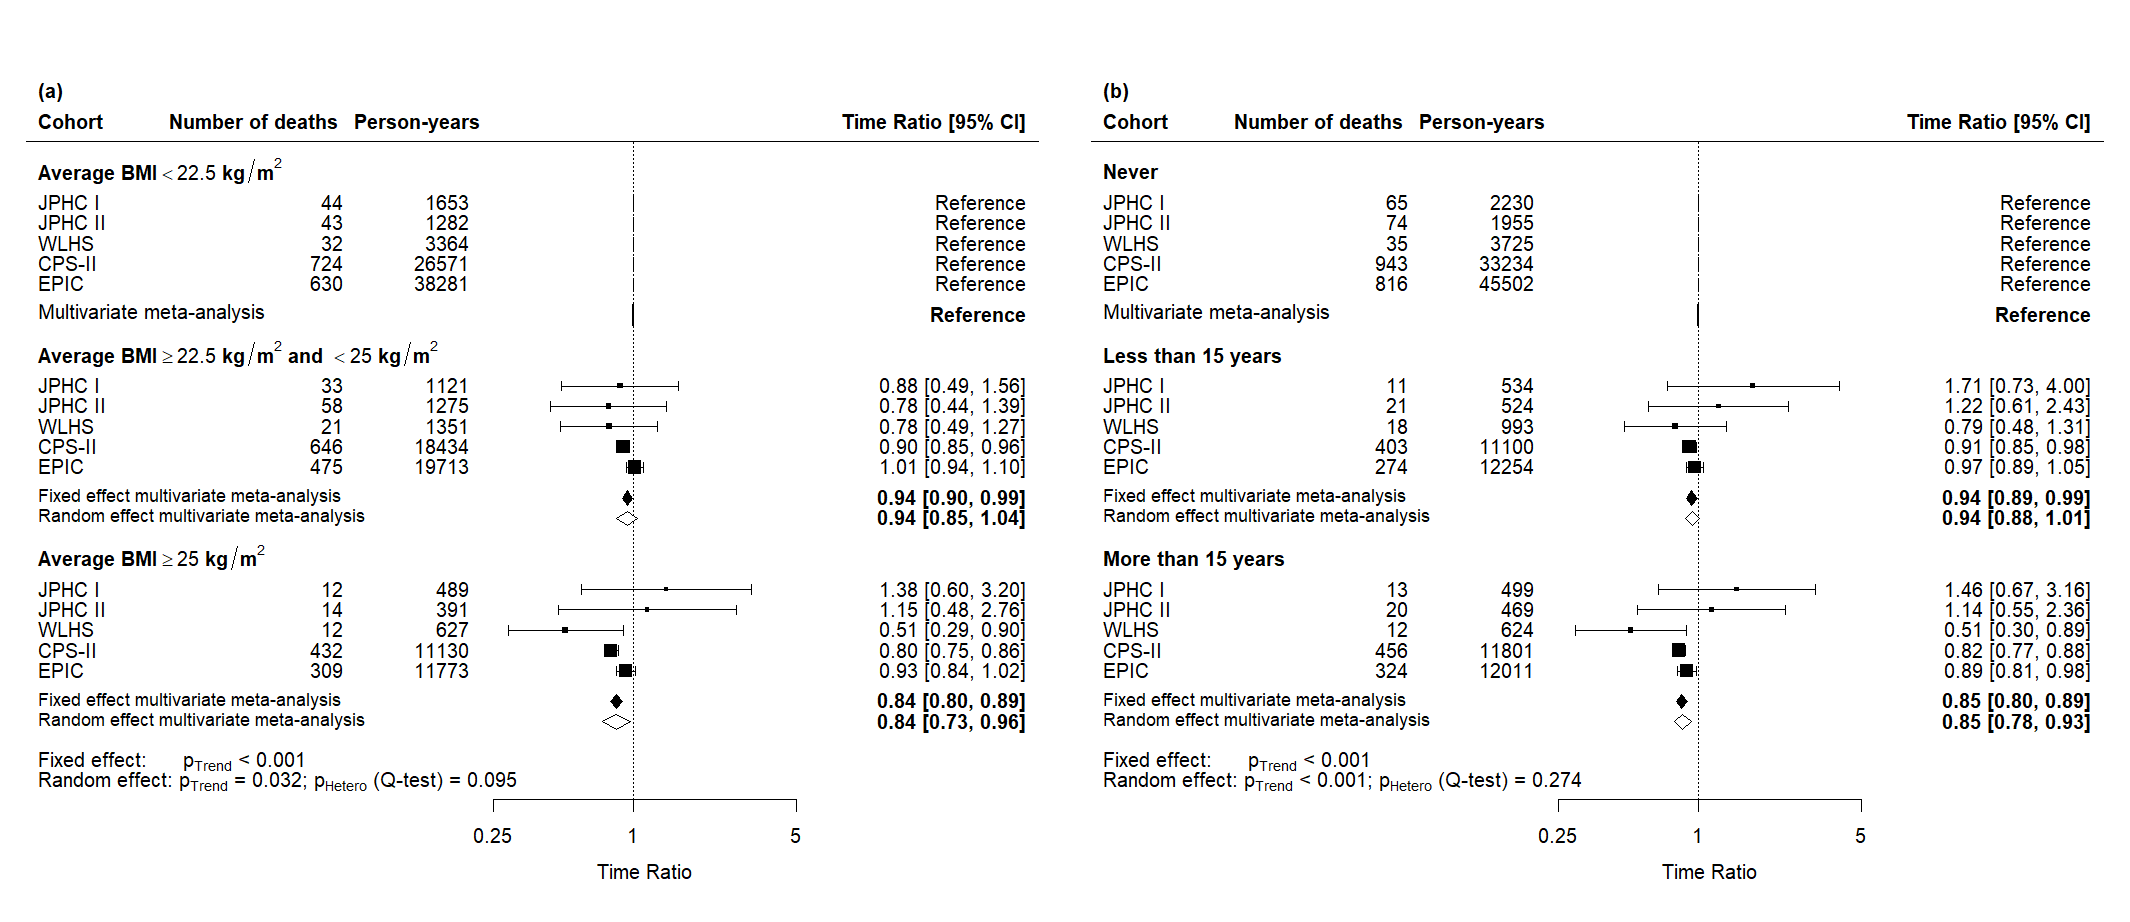


Supplementary Figure 2. Cohort-specific and pooled ratio (measured in terms of time ratios) of mortality among women diagnosed with breast cancer after the age of 50 years (a) by categories of average body mass index (BMI); (b) by categories of cumulative time spent with overweight (body mass index, BMI 25 kg/m2) during early and mid-adulthood. The model was adjusted for smoking status, alcohol consumption, vigorous physical activity, education, and history of diabetes at study entry, and stratified on cancer stage at diagnosis, age at diagnosis, and country (for the EPIC study only). Abbreviations for study names are as follows: CPS-II, Cancer Prevention Study II; EPIC, European Prospective Investigation into Cancer and nutrition; JPHC I, Japanese Public Health Center-based study cohort I; JPHC II, Japanese Public Health Center-based study cohort II; WLHS, Women’s Lifestyle and Health Study.


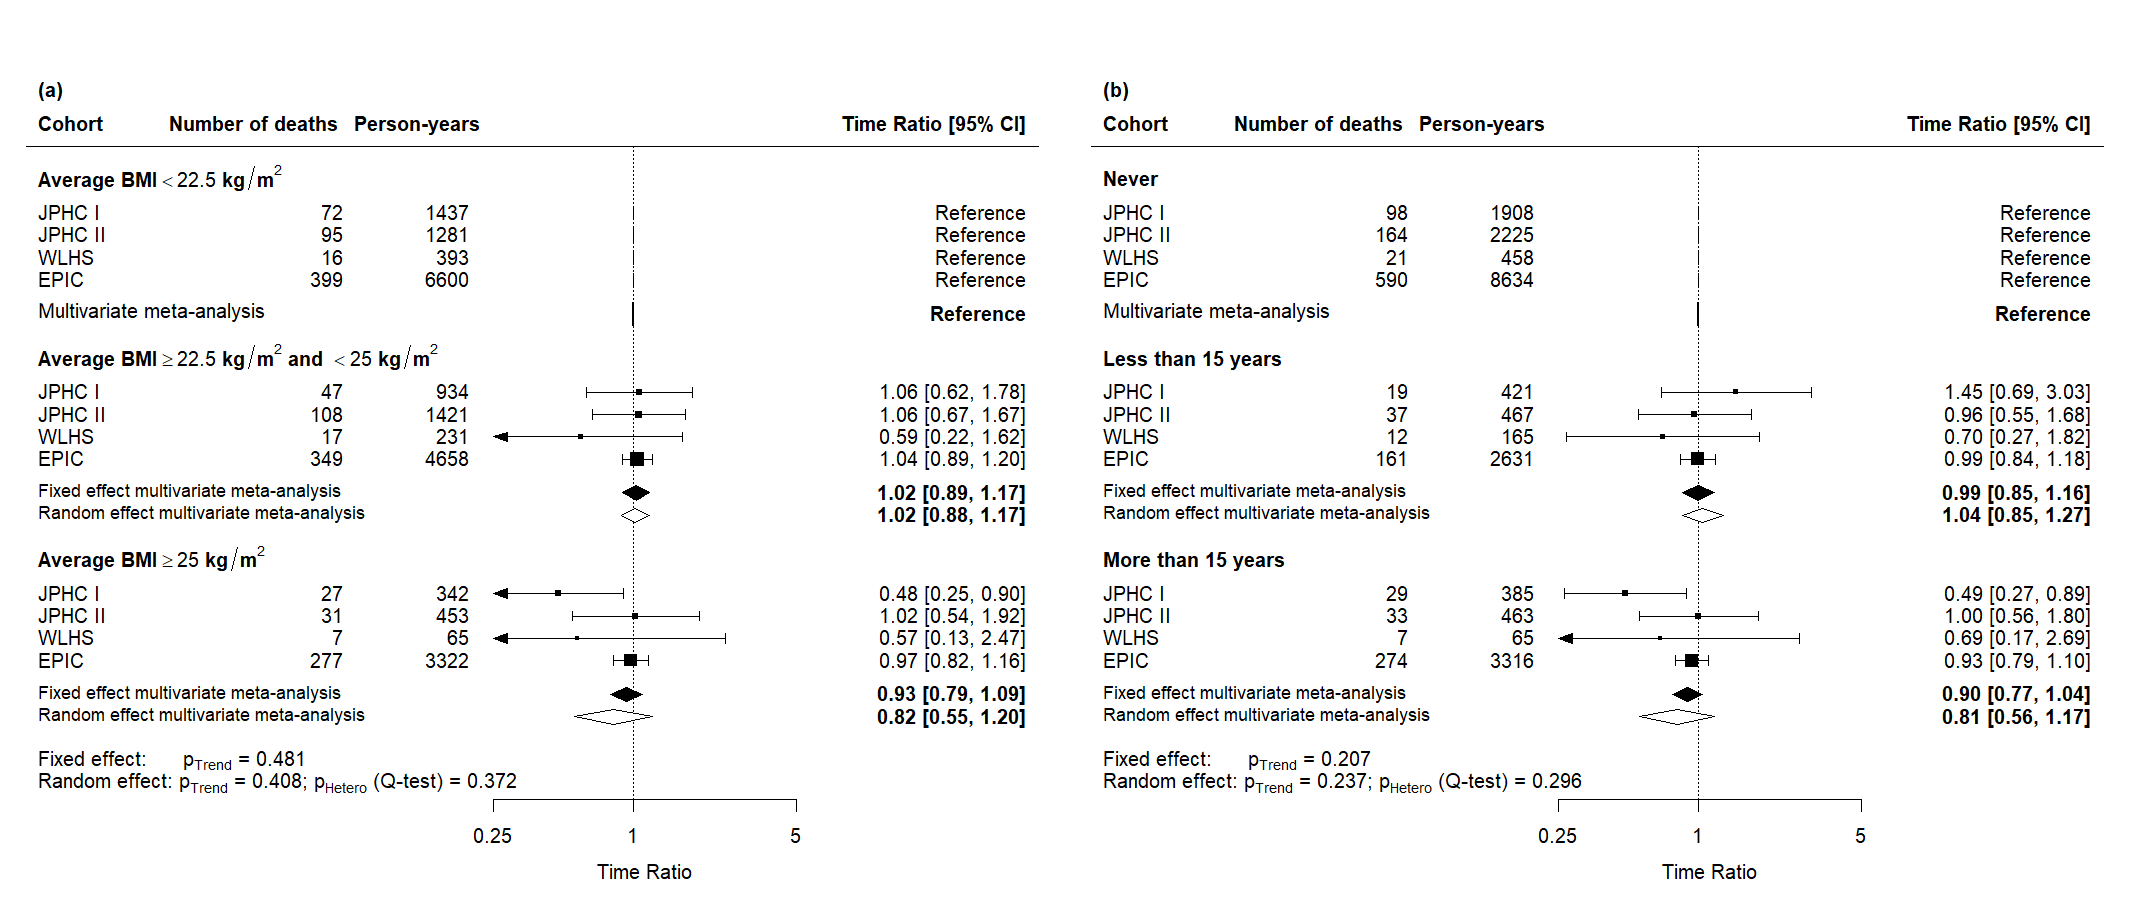


Supplementary Figure 3. Cohort-specific and pooled ratio (measured in terms of time ratios) of mortality among women diagnosed with colorectal cancer after the age of 50 years (a) by categories of average body mass index (BMI); (b) by categories of cumulative time spent with overweight (body mass index, BMI 25 kg/m2) during early and mid-adulthood. The model was adjusted for smoking status, alcohol consumption, vigorous physical activity, education, and history of diabetes at study entry, and stratified on cancer stage at diagnosis, age at diagnosis, and country (for the EPIC study only). Abbreviations for study names are as follows: EPIC, European Prospective Investigation into Cancer and nutrition; JPHC I, Japanese Public Health Center-based study cohort I; JPHC II, Japanese Public Health Center-based study cohort II; WLHS, Women’s Lifestyle and Health Study.


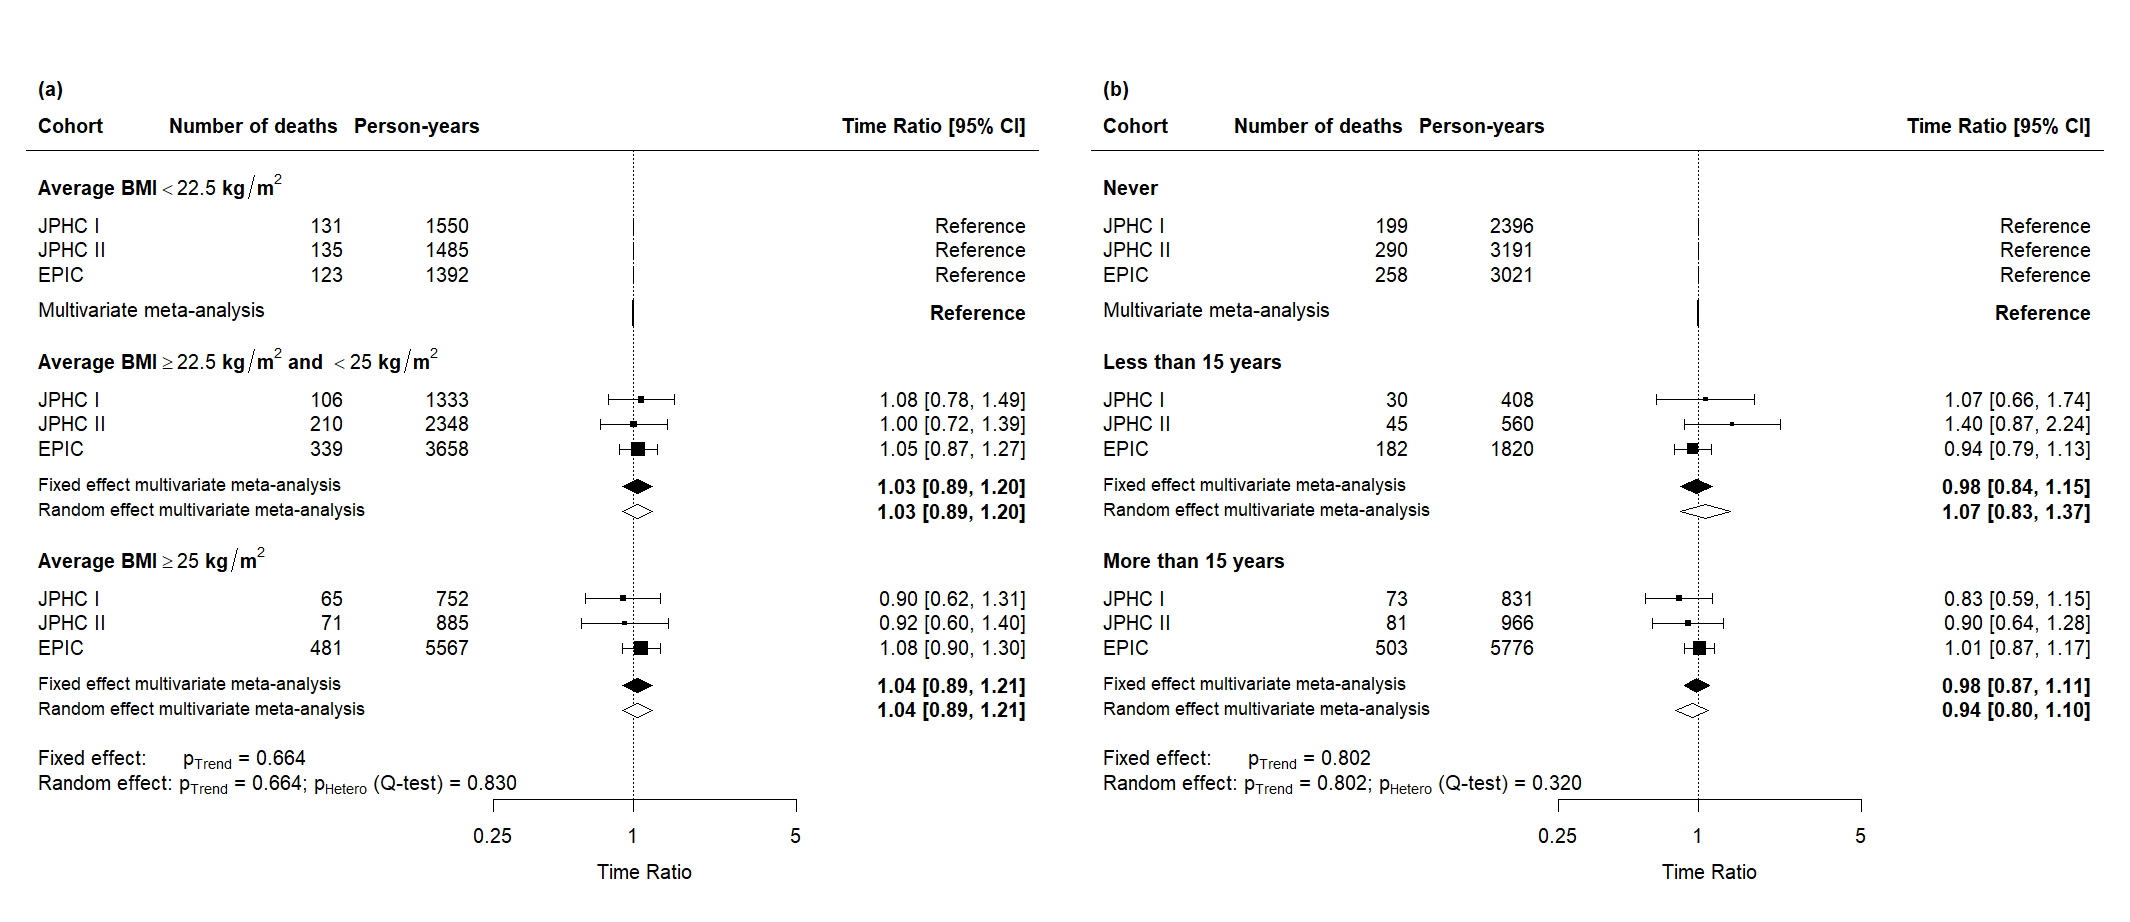


Supplementary Figure 4. Cohort-specific and pooled ratio (measured in terms of time ratios) of mortality among men diagnosed with colorectal cancer after the age of 50 years (a) by categories of average body mass index (BMI); (b) by categories of cumulative time spent with overweight (body mass index, BMI 25 kg/m2) during early and mid-adulthood. The model was adjusted for smoking status, alcohol consumption, vigorous physical activity, education, and history of diabetes at study entry, and stratified on cancer stage at diagnosis, age at diagnosis, and country (for the EPIC study only). Abbreviations for study names are as follows: EPIC, European Prospective Investigation into Cancer and nutrition; JPHC I, Japanese Public Health Center-based study cohort I; JPHC II, Japanese Public Health Center-based study cohort II.


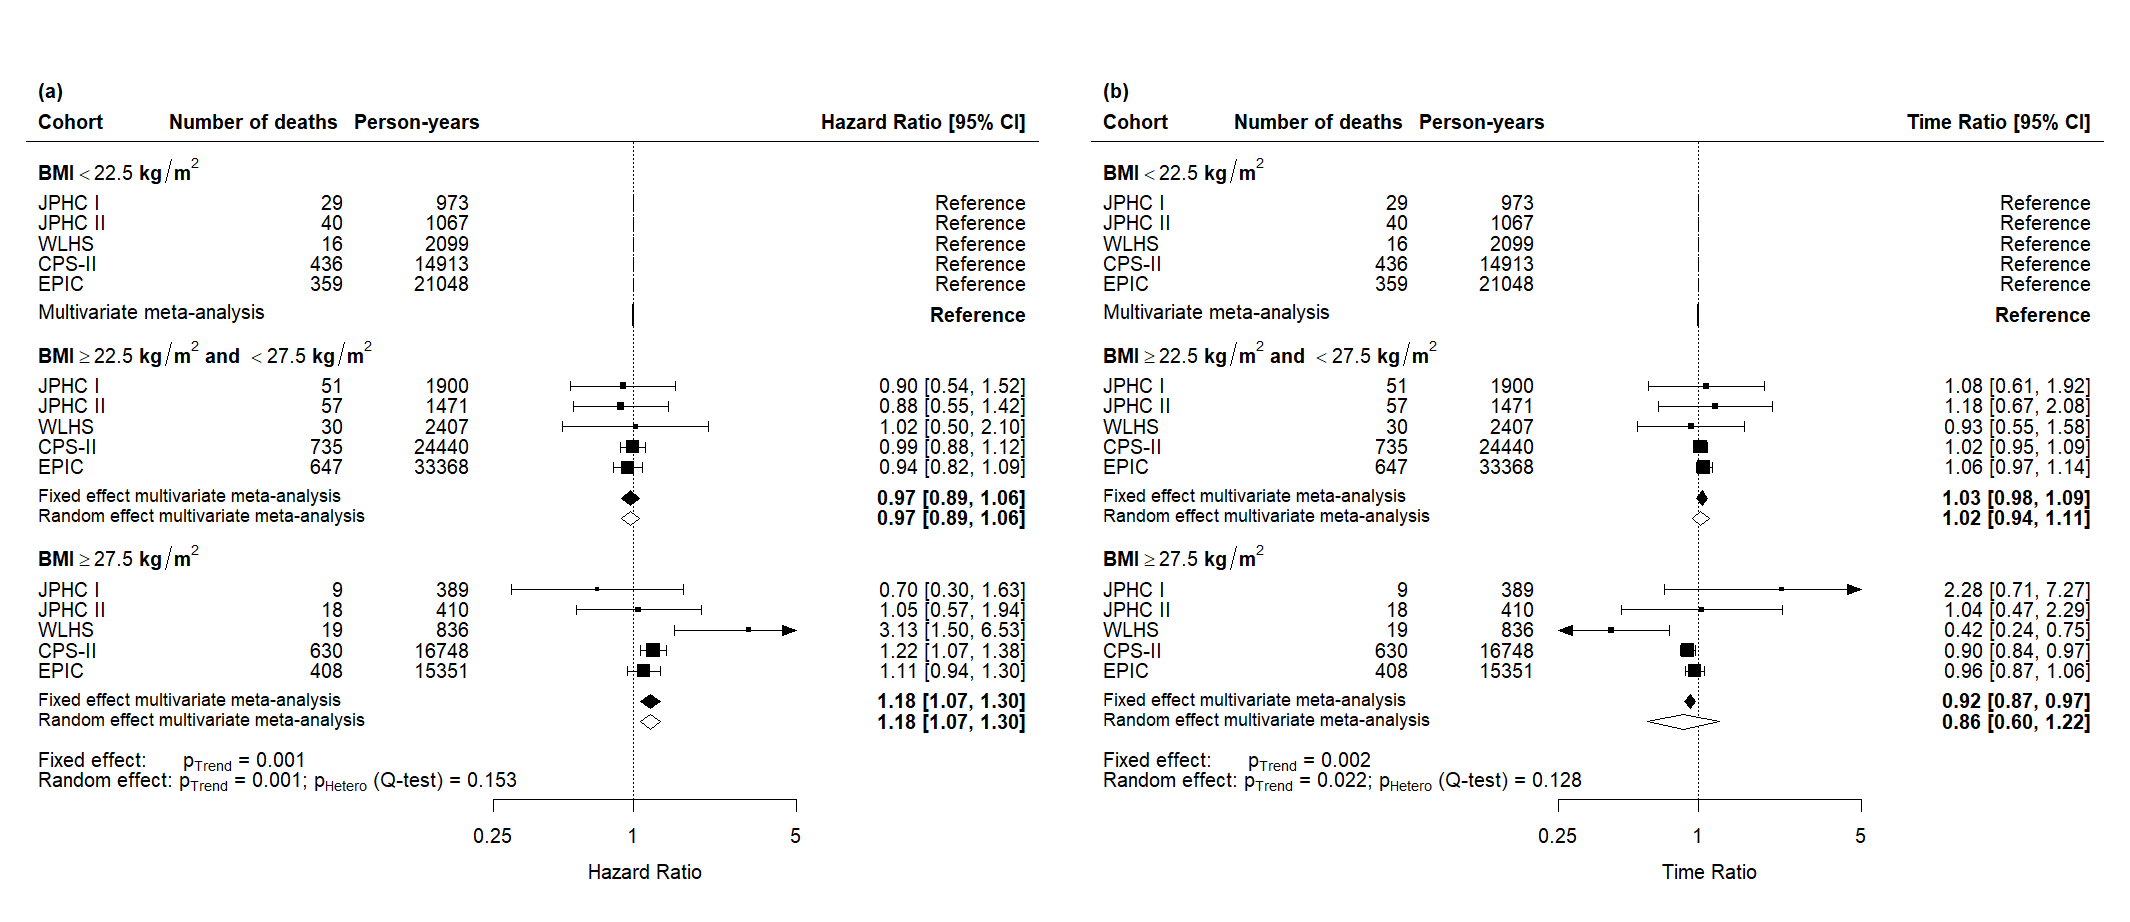


Supplementary Figure 5. Cohort-specific and pooled ratio (a) measured in terms of hazard ratios; (b) measured in terms of time ratios of mortality among women diagnosed with breast cancer after the age of 50 years by categories of single point-in-time BMI (last recorded BMI before cancer diagnosis). The model was adjusted for smoking status, alcohol consumption, vigorous physical activity, education, and history of diabetes at study entry, and stratified on cancer stage at diagnosis, age at diagnosis, and country (for the EPIC study only). Abbreviations for study names are as follows: CPS-II, Cancer Prevention Study II; EPIC, European Prospective Investigation into Cancer and nutrition; JPHC I, Japanese Public Health Center-based study cohort I; JPHC II, Japanese Public Health Center-based study cohort II; WLHS, Women’s Lifestyle and Health Study.


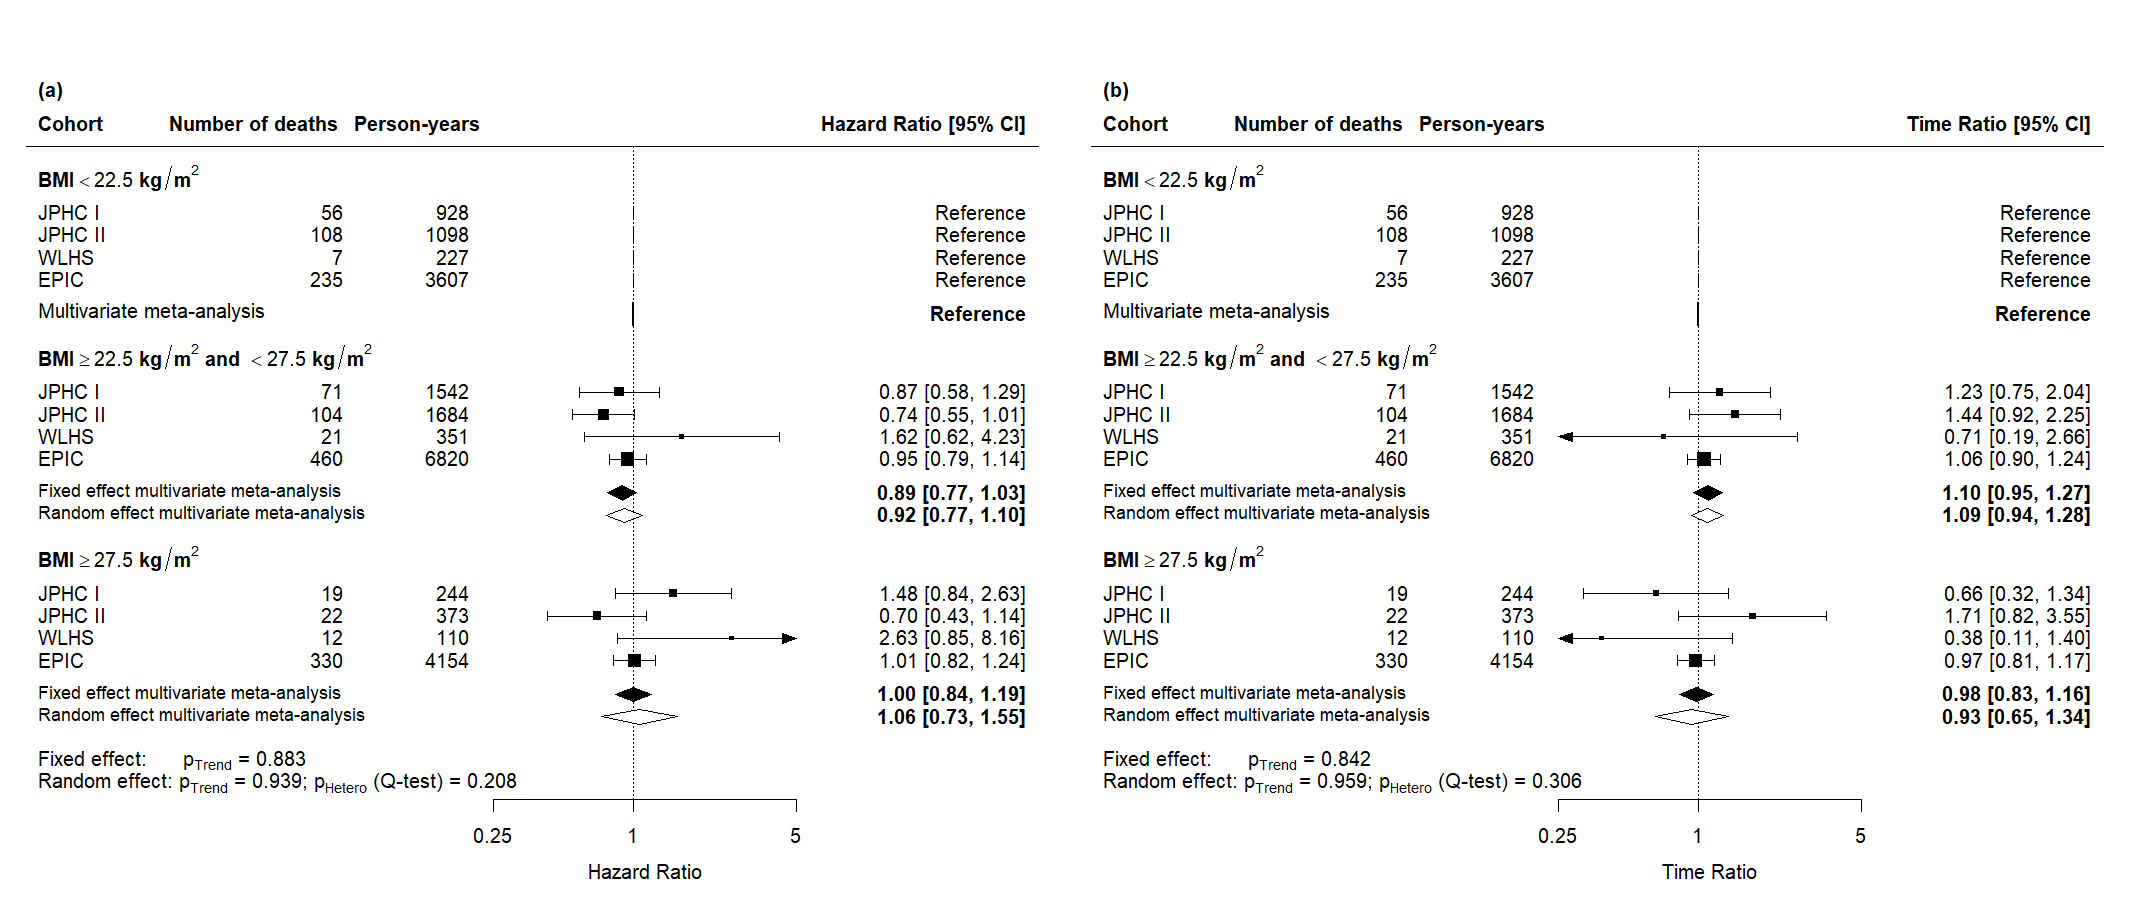


Supplementary Figure 6. Cohort-specific and pooled ratio (a) measured in terms of hazard ratios; (b) measured in terms of time ratios of mortality among women diagnosed with colorectal cancer after the age of 50 years by categories of single point-in-time BMI (last recorded BMI before cancer diagnosis). The model was adjusted for smoking status, alcohol consumption, vigorous physical activity, education, and history of diabetes at study entry, and stratified on cancer stage at diagnosis, age at diagnosis, and country (for the EPIC study only). Abbreviations for study names are as follows: EPIC, European Prospective Investigation into Cancer and nutrition; JPHC I, Japanese Public Health Center-based study cohort I; JPHC II, Japanese Public Health Center-based study cohort II; WLHS, Women’s Lifestyle and Health Study.


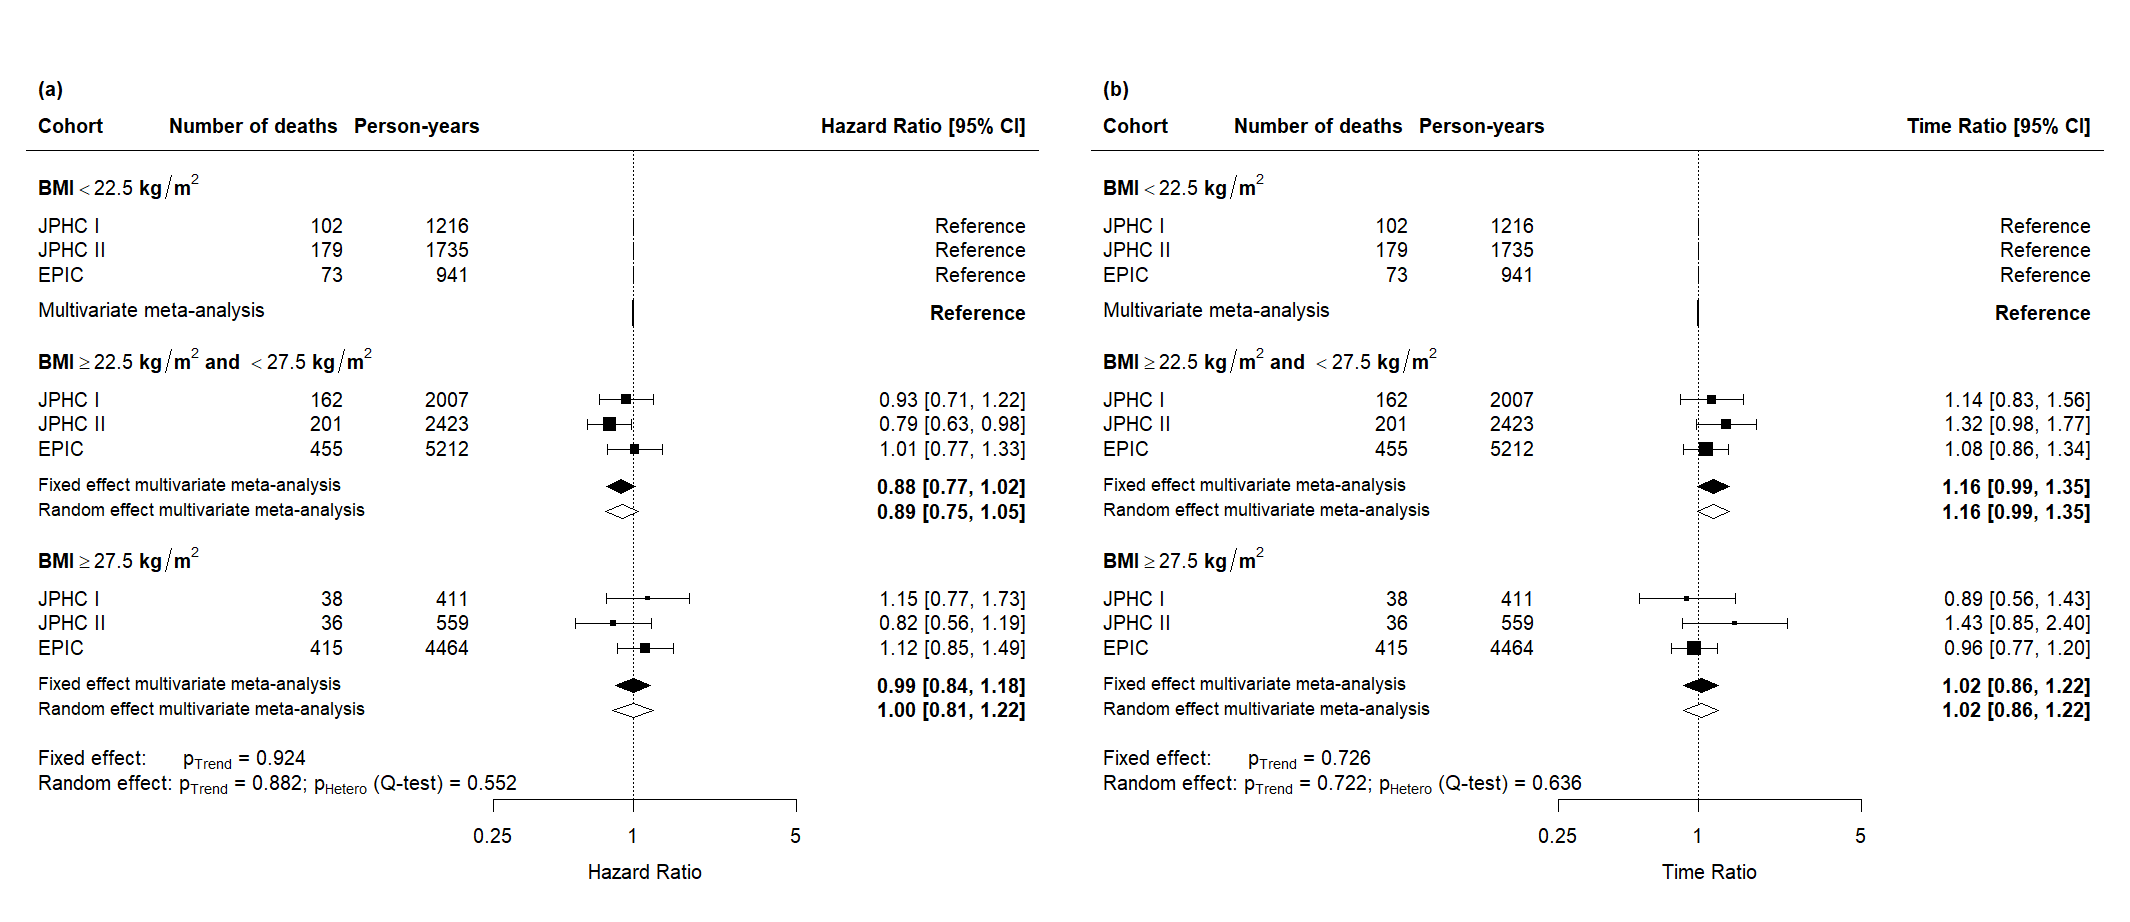


Supplementary Figure 7. Cohort-specific and pooled ratio (a) measured in terms of hazard ratios; (b) measured in terms of time ratios of mortality among men diagnosed with colorectal cancer after the age of 50 years by categories of single point-in-time BMI (last recorded BMI before cancer diagnosis). The model was adjusted for smoking status, alcohol consumption, vigorous physical activity, education, and history of diabetes at study entry, and stratified on cancer stage at diagnosis, age at diagnosis, and country (for the EPIC study only). Abbreviations for study names are as follows: EPIC, European Prospective Investigation into Cancer and nutrition; JPHC I, Japanese Public Health Center-based study cohort I; JPHC II, Japanese Public Health Center-based study cohort II.
